# Supplementary material
Source: Springer Nature journal article supplement (https://www.springermedizin.de/resource/supplementary/12885_2008_1324_MOESM4_ESM.pdf/9471766)

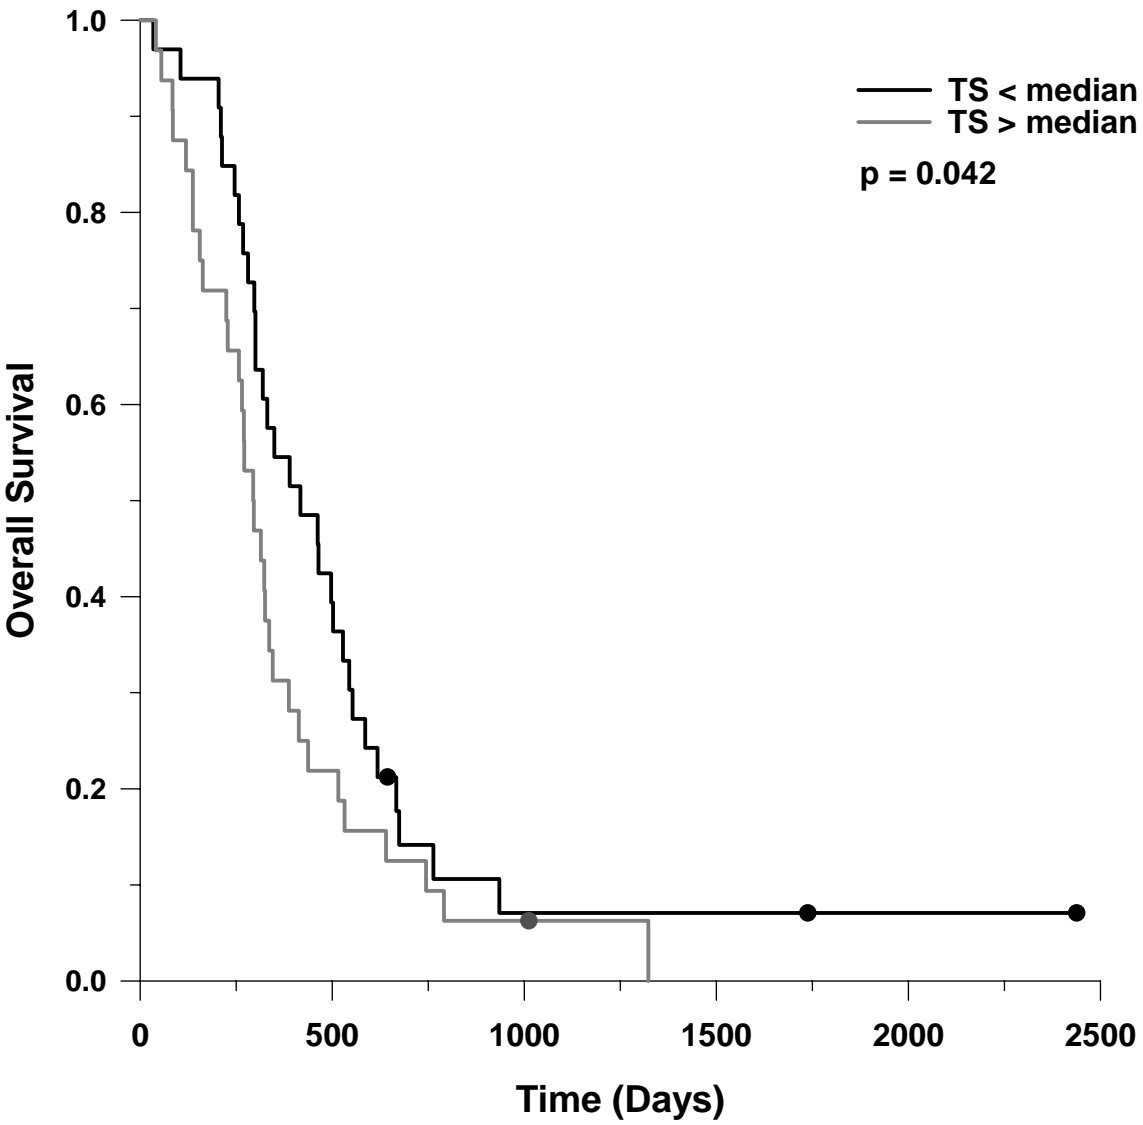

Supplement: MOESM4 [file 9471766]
